# Supplementary material for: Geometrically controlled preparation of various cell aggregates by droplet-based microfluidics
Source: Royal Society of Chemistry journal article supplement (doi:10.1039/c5ay02466h), 2015-01-01
Supplement: c5ay02466h1.pdf [file c5ay02466h1.pdf]

## Electronic Supplementary Information

# Geometrically controlled preparation of various cell aggregates by droplet-based microfluidics

Yaolei Wang,<sup>a</sup> Lei Zhao,<sup>b</sup> Chang Tian,<sup>b</sup> Chao Ma,<sup>b</sup> and Jinyi Wang<sup>\*a,b</sup>

<sup>a</sup> *College of Science, Northwest A&F University, Yangling, Shaanxi 712100, P. R. China*

<sup>b</sup> *College of Veterinary Medicine, Northwest A&F University, Yangling, Shaanxi 712100, P. R. China*

**Abstract.** This Supplementary data include all of the additional information as noted in the manuscript.

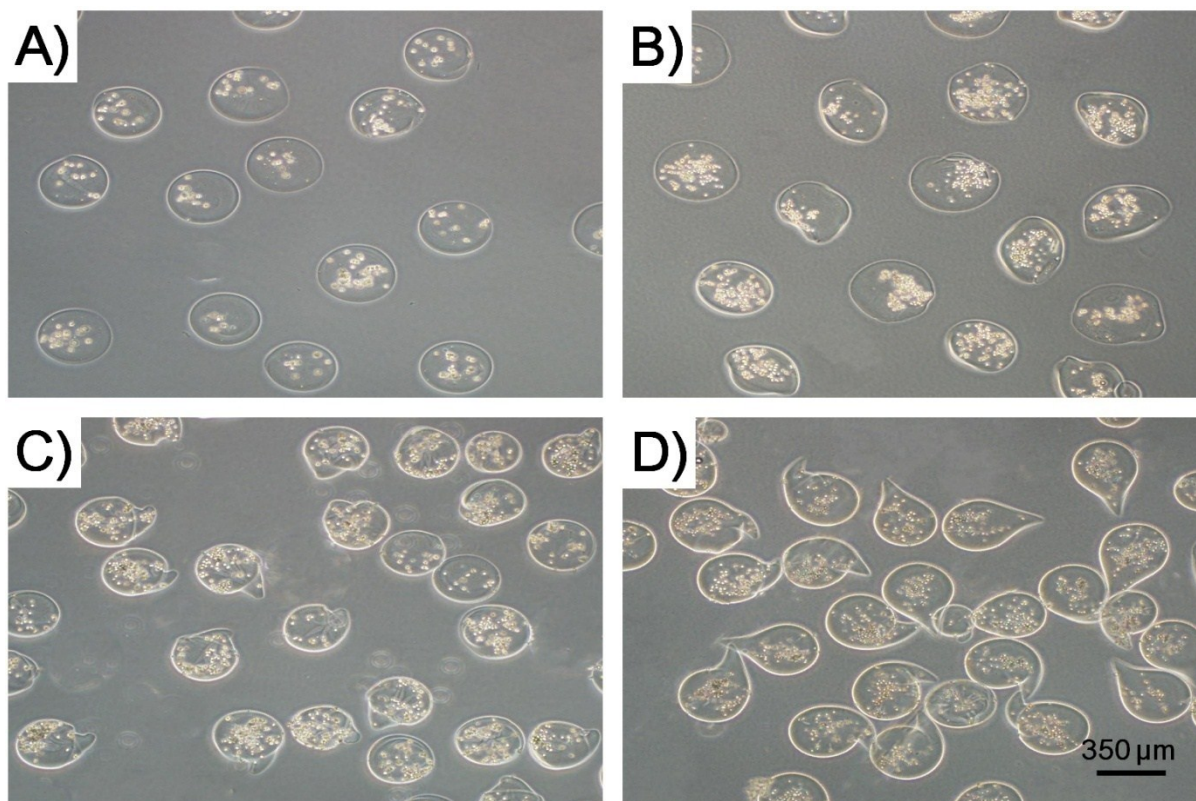

**Fig. S1.** Phase contrast images of Ca-alginate microparticles containing HeLa cells, formed by crosslinking 0.5% (A), 1% (B), 2% (C), and 3% (D) alginate with 5%  $\text{CaCl}_2$ , respectively.

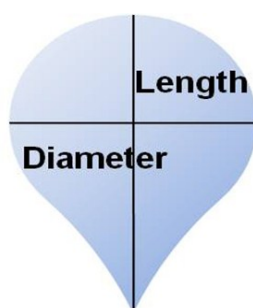

**Fig. S2.** To facilitate the quantitative analysis of the tail-shaped microparticles, the diameter and length of the microparticles were calculated as described in this figure.

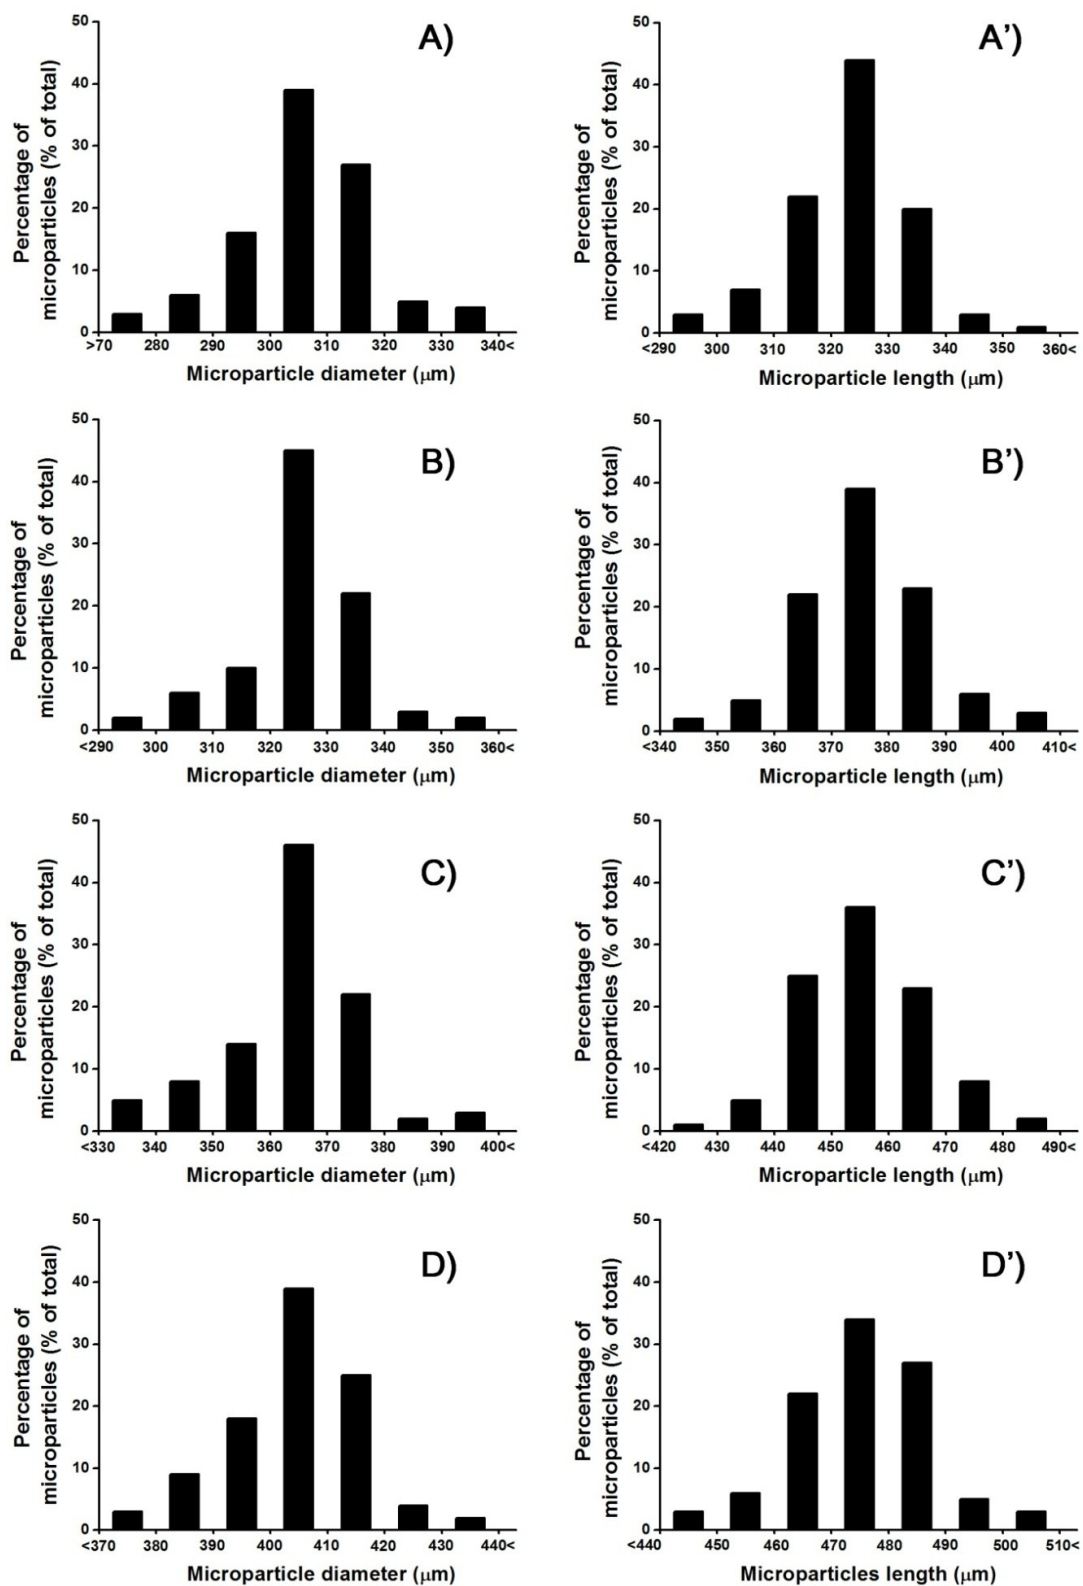

**Fig. S3.** Statistical graphs of the diameter and length distributions of Ca-alginate microparticles, formed by crosslinking 0.5% (A and A'), 1% (B and B'), 2% (C and C'), and 3% (D and D') alginate with 5%  $\text{CaCl}_2$ , respectively.

**Table S1.** Statistical analysis of the diameter and length Ca-alginate microparticles formed by crosslinking 0.5%, 1%, 2%, and 3% alginate with 5% CaCl<sub>2</sub>, respectively (n=100).

| Alginate (%) | Diameter (μm) | Length (μm)  |
|--------------|---------------|--------------|
| 0.5          | 314.95±15.38  | 320.80±19.69 |
| 1            | 330.69 ±17.51 | 398.52±25.21 |
| 2            | 368.08 ±16.83 | 458.72±24.16 |
| 3            | 410.46±19.12  | 482.59±19.61 |

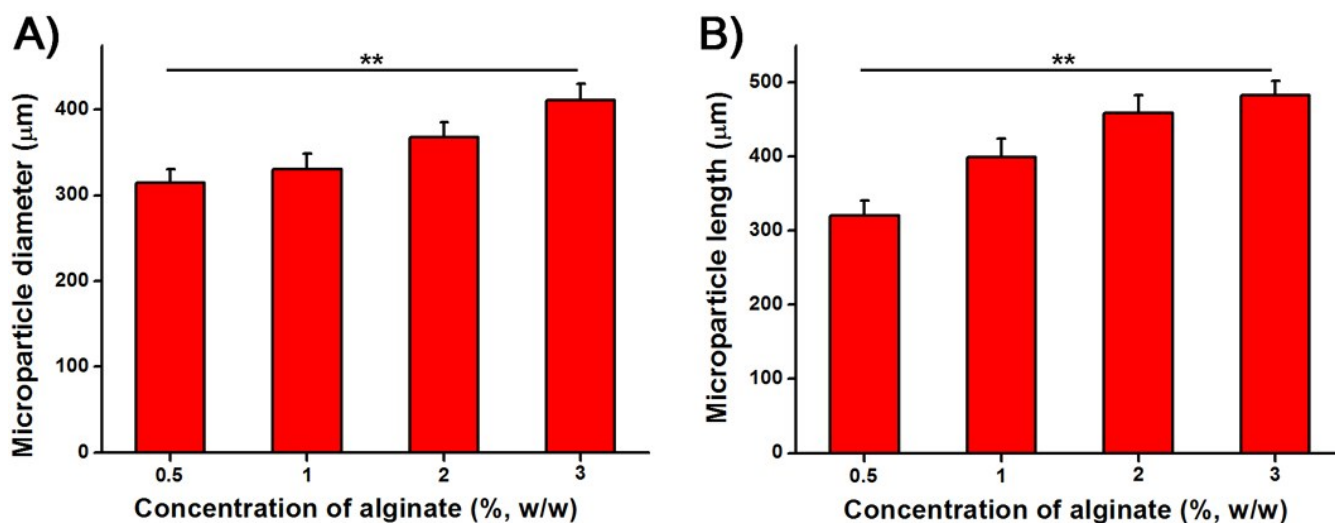

**Fig. S4.** Statistical analysis of the diameter (A) and length (B) of Ca-alginate microparticles formed by crosslinking 0.5%, 1%, 2%, and 3% alginate with 5% CaCl<sub>2</sub>, respectively. Data are presented as the mean ± SD, n = 100, with significance assessed by ANOVA. \*\*  $p < 0.001$ .

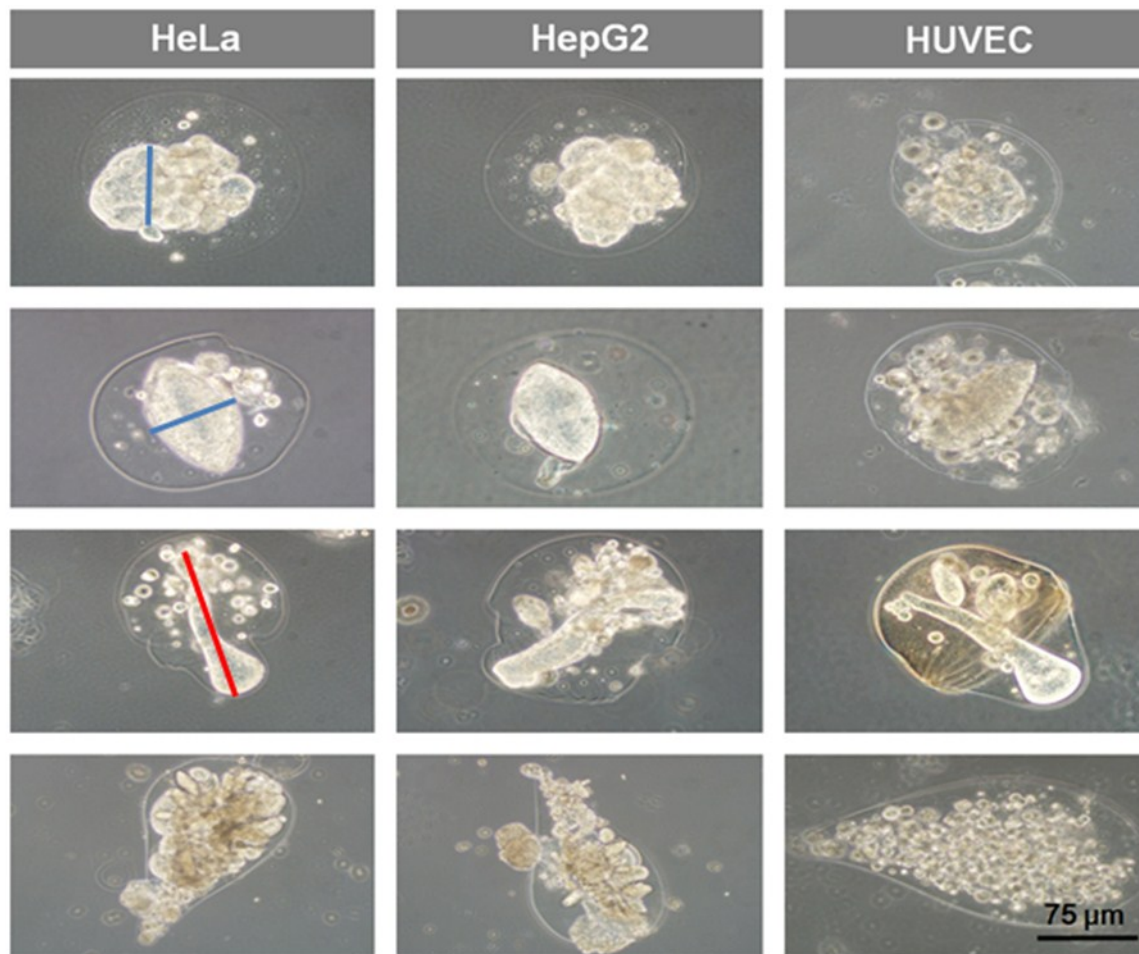

**Fig. S5.** Typical phase contrast images of HeLa, HepG2 and HUVEC cell aggregates after culture 96 h in different Ca-alginate microparticles formed (from top to bottom) by crosslinking 0.5% (the first row), 1% (the second row), 2% (the third row), and 3% (the fourth row) alginate with 5%  $\text{CaCl}_2$ , respectively. The blue lines defined the diameter of the spherical and spindle-like cell aggregates and the red line defined the length of the branch-like cell aggregates.



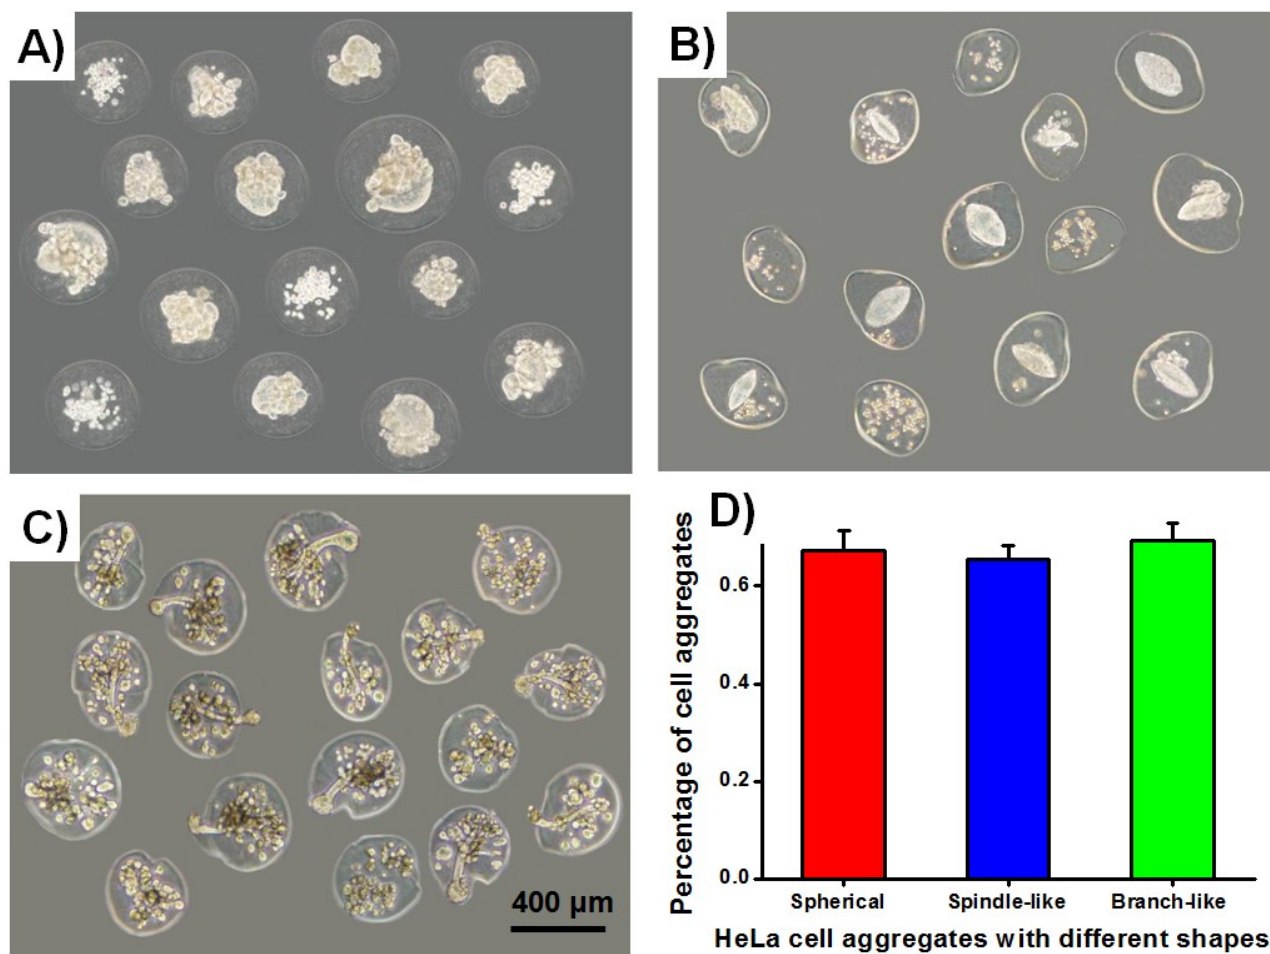

**Fig. S6.** Typical images of HeLa cell aggregates with spherical (A), spindle-like (B) and branch-like (C) shapes formed in their corresponding microbeads. D) Statistical analysis of different shape cell aggregates formed in their corresponding microbeads (n=50).

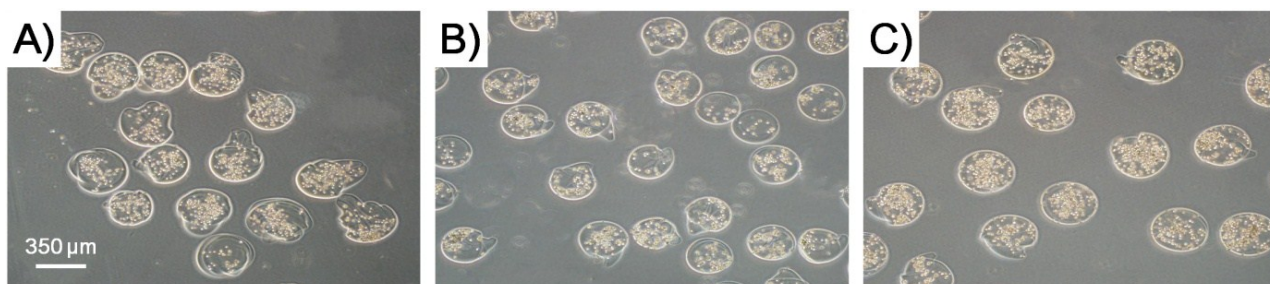

**Fig. S7.** Phase contrast images of Ca-alginate microparticles containing HeLa cells, formed by crosslinking 2.5% (A), 5% (B), and 10% (C)  $\text{CaCl}_2$  with 2% alginate, respectively.

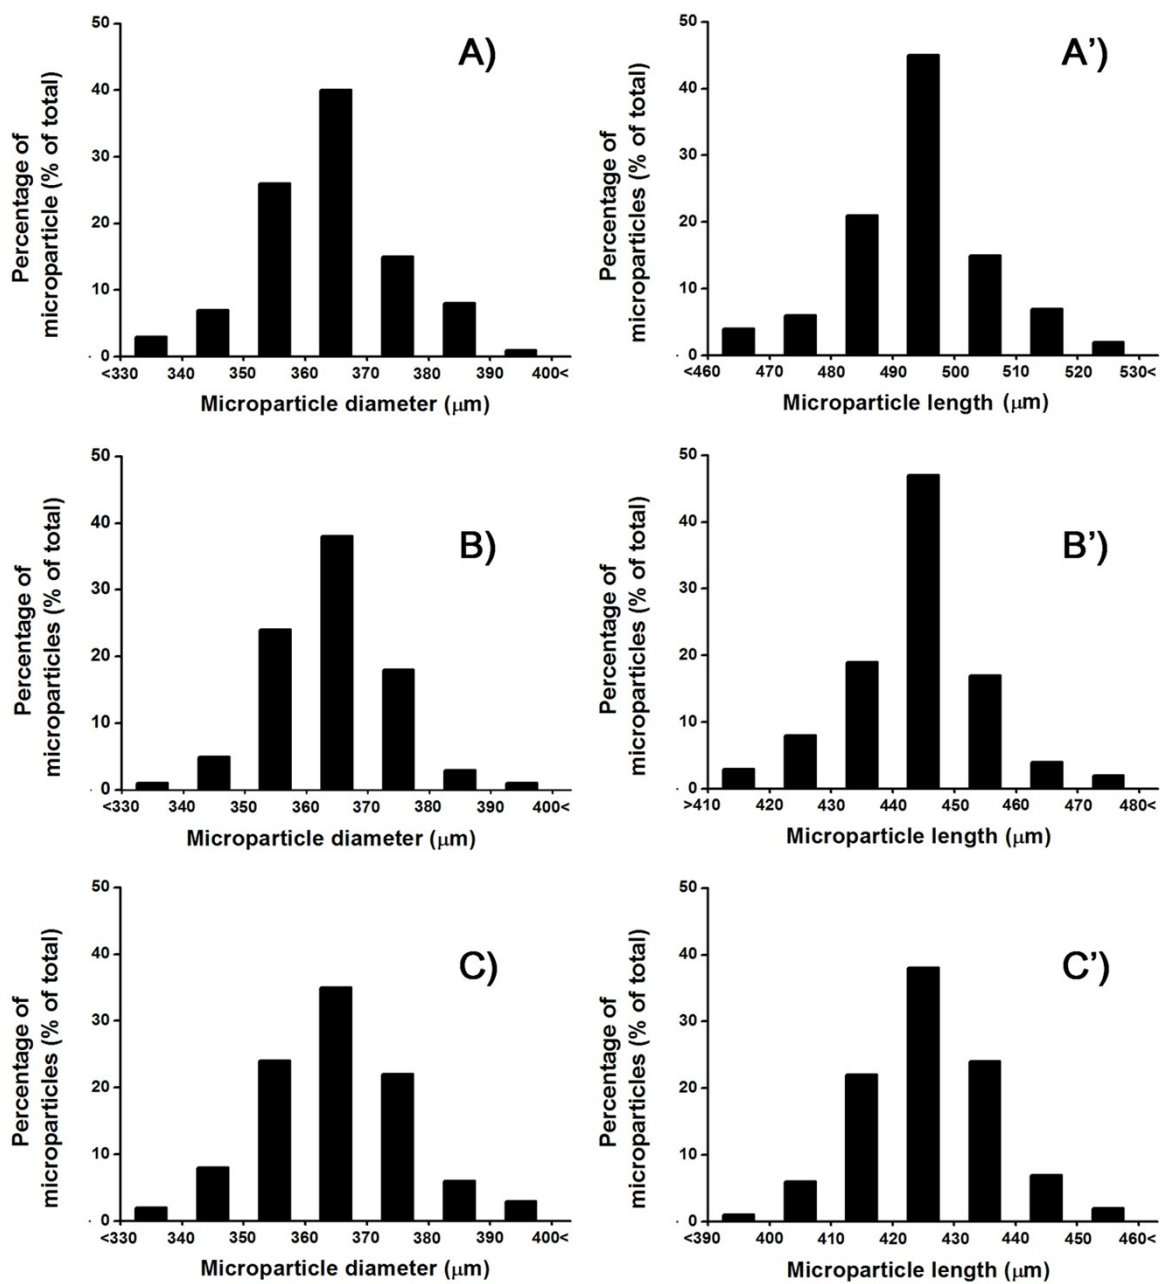

**Fig. S8.** Statistical graphs of the diameter and length distributions of Ca-alginate microparticles, formed by crosslinking 2.5% (A and A'), 5% (B and B'), and 10% (C and C') CaCl<sub>2</sub> with 2% alginate, respectively.

**Table S2.** Statistical analysis of the diameter and length of Ca-alginate microparticles formed by crosslinking 2.5%, 5%, and 10% CaCl<sub>2</sub> with 2% alginate, respectively (n=100).

| CaCl <sub>2</sub> (%) | Diameter (μm) | Length (μm)  |
|-----------------------|---------------|--------------|
| 2.5                   | 366.08±13.38  | 495.72±18.69 |
| 5                     | 368.35±14.51  | 446.72±19.21 |
| 10                    | 367.38±15.83  | 425.26±17.16 |

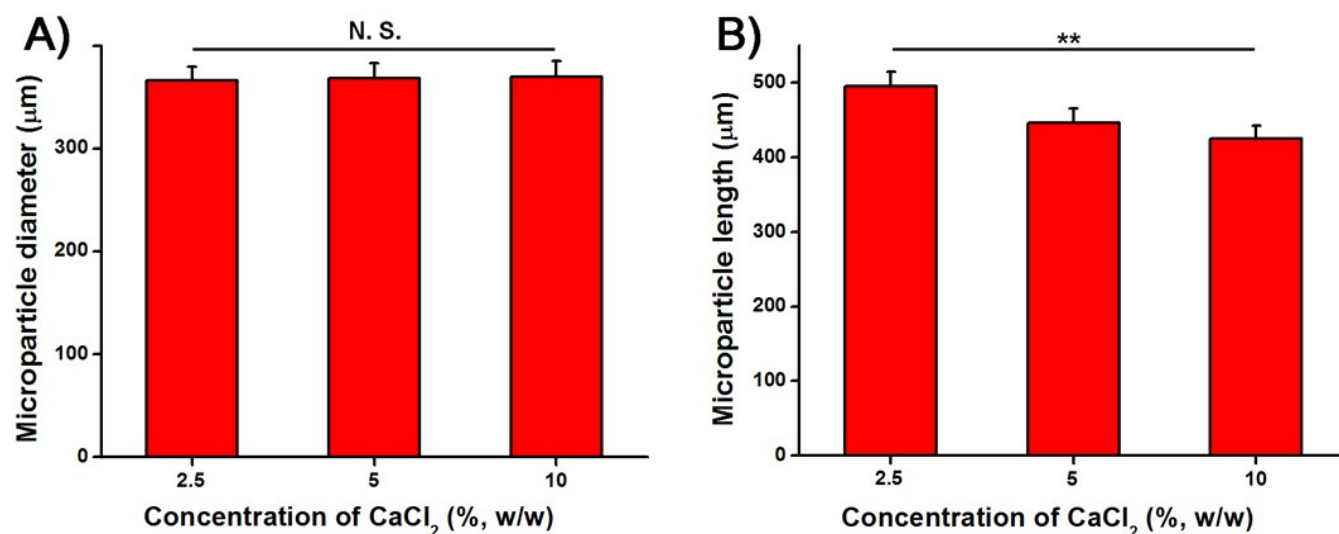

**Fig. S9.** Statistical analysis of the diameter (A) and length (B) of Ca-alginate microparticles formed by crosslinking 2.5%, 5%, and 10% CaCl<sub>2</sub> with 2% alginate, respectively. Data are presented as the mean ± SD, n = 100, with significance assessed by ANOVA. \*\*  $p < 0.001$ ; N.S., not significant.



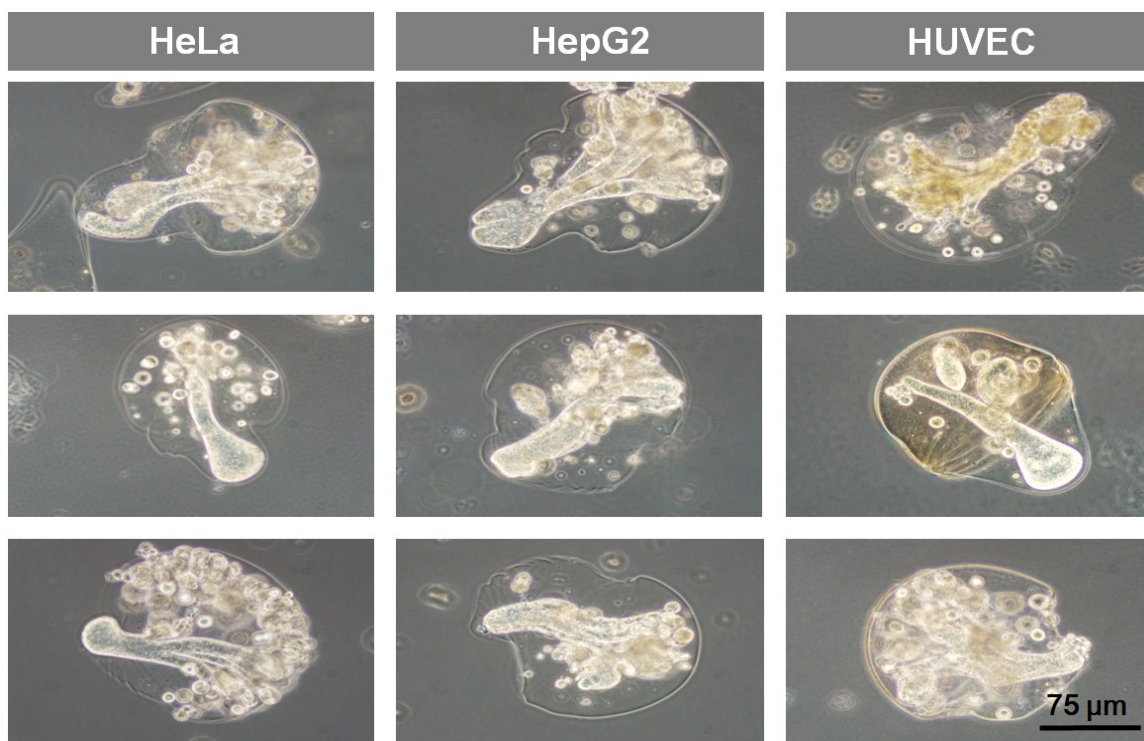

**Fig. S10.** Typical phase contrast images of HeLa, HepG2 and HUVEC cell aggregates after culture 96 h in different Ca-alginate microparticles formed (from top to bottom) by crosslinking 2.5% (the first row), 5% (the second row), and 10% (the third row)  $\text{CaCl}_2$  with 2% alginate, respectively.

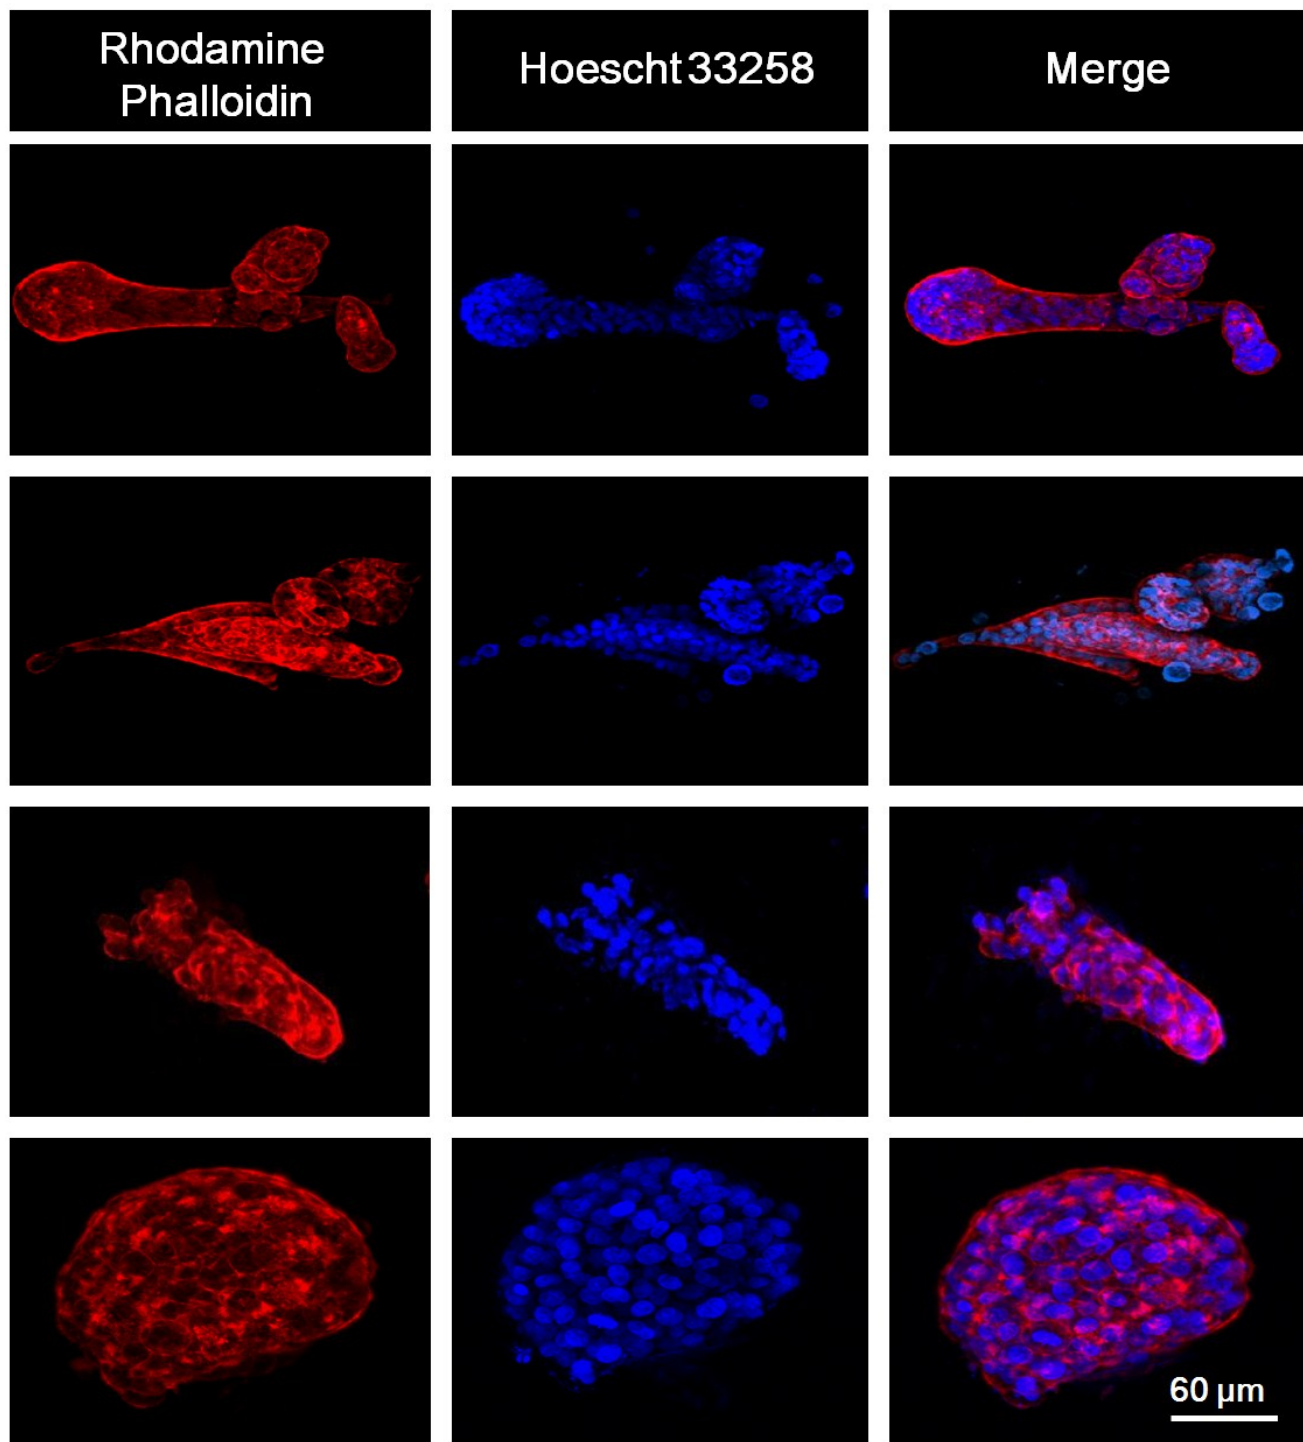

**Fig. S11.** Fluorescence images of the different shapes of HeLa cell aggregates formed in their corresponding microparticles. From top to bottom: the concentrations of alginate and  $\text{CaCl}_2$  used for the formation of the corresponding microparticles were 2% and 5% (the first row), 2% and 2.5% (the second row), 1% and 5% (the third row), and 0.5% and 5% (the fourth row), respectively. Cell aggregates were stained with rhodamine phalloidin (red) and Hoechst 33258 (blue).

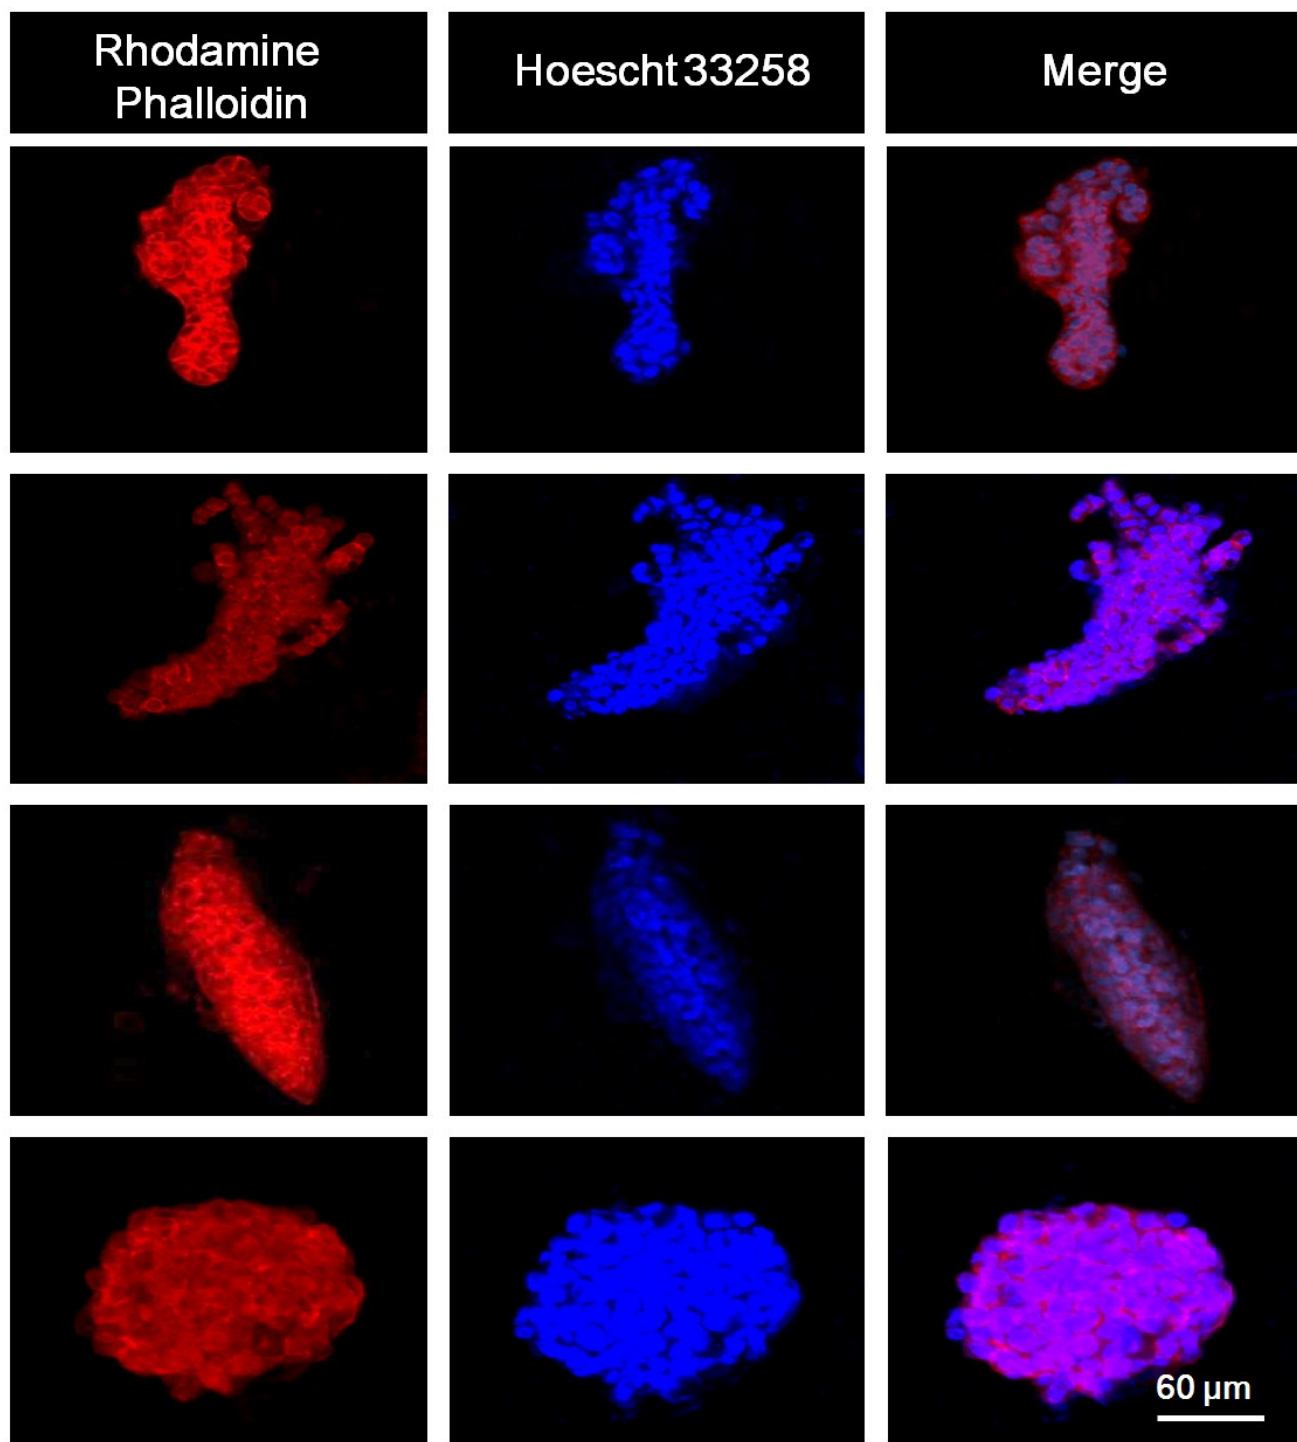

**Fig. S12.** Fluorescence images of the different shapes of HepG2 cell aggregates formed in their corresponding microparticles. From top to bottom: the concentrations of alginate and  $\text{CaCl}_2$  used for the formation of the corresponding microparticles were 2% and 5% (the first row), 2% and 2.5% (the second row), 1% and 5% (the third row), and 0.5% and 5% (the fourth row), respectively. Cell aggregates were stained with rhodamine phalloidin (red) and Hoechst 33258 (blue).

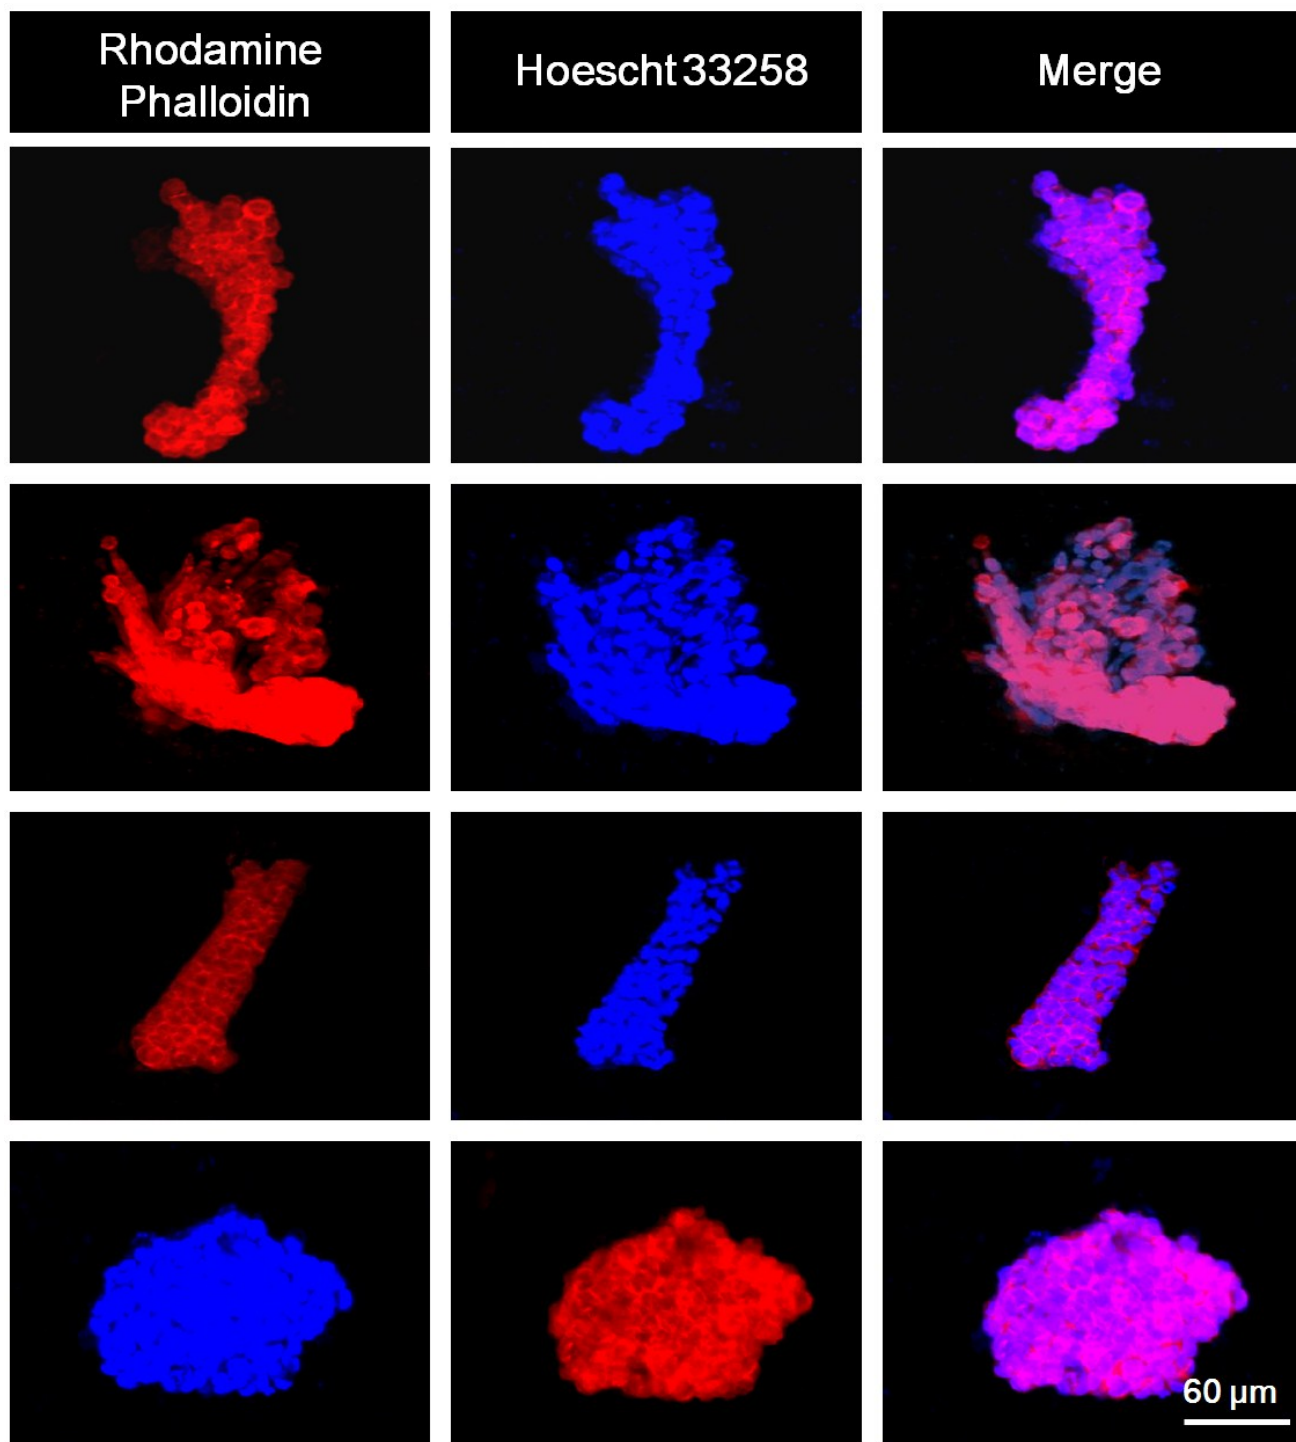

**Fig. S13.** Fluorescence images of the different shapes of HUVEC aggregates formed in their corresponding microparticles. From top to bottom: the concentrations of alginate and  $\text{CaCl}_2$  used for the formation of the corresponding microparticles were 2% and 5% (the first row), 2% and 2.5% (the second row), 1% and 5% (the third row), and 0.5% and 5% (the fourth row), respectively. Cell aggregates were stained with rhodamine phalloidin (red) and Hoechst 33258 (blue).



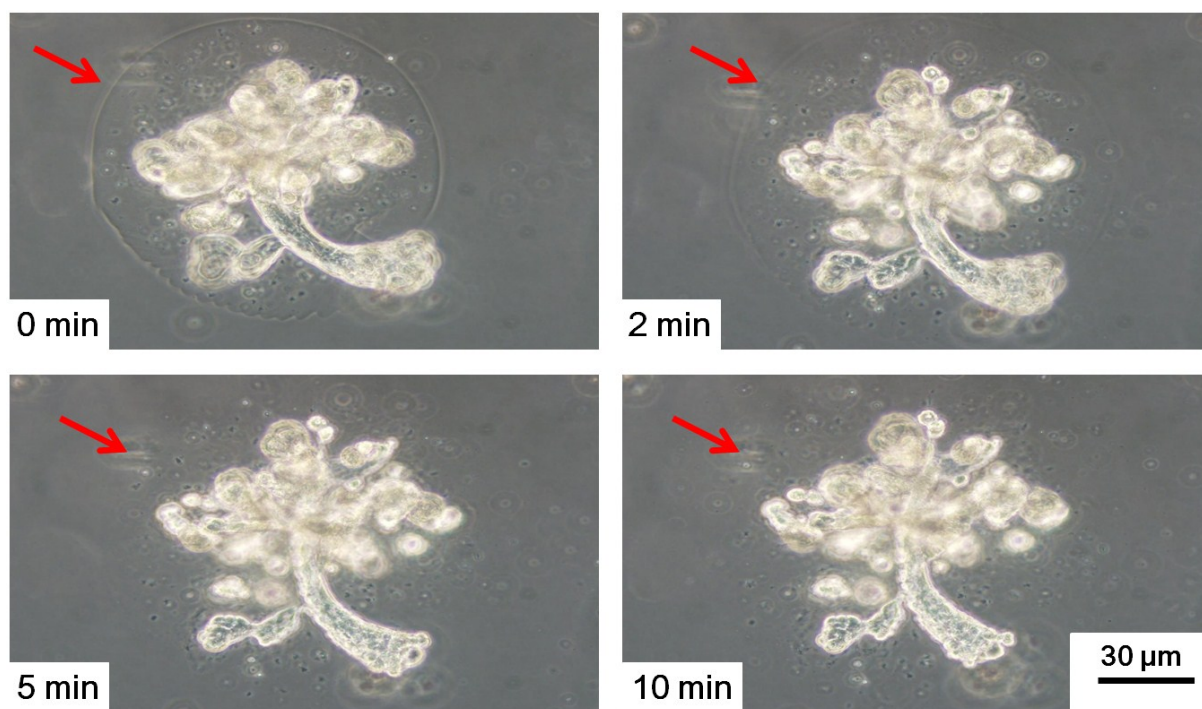

**Fig. S14.** Time-sequence images of the retrieval of HeLa cell aggregates from Ca-alginate microparticles. As time passed, Ca-alginate microparticles were dissolved gradually (red arrow). After 10 min, the Ca-alginate microparticles were dissolved completely.



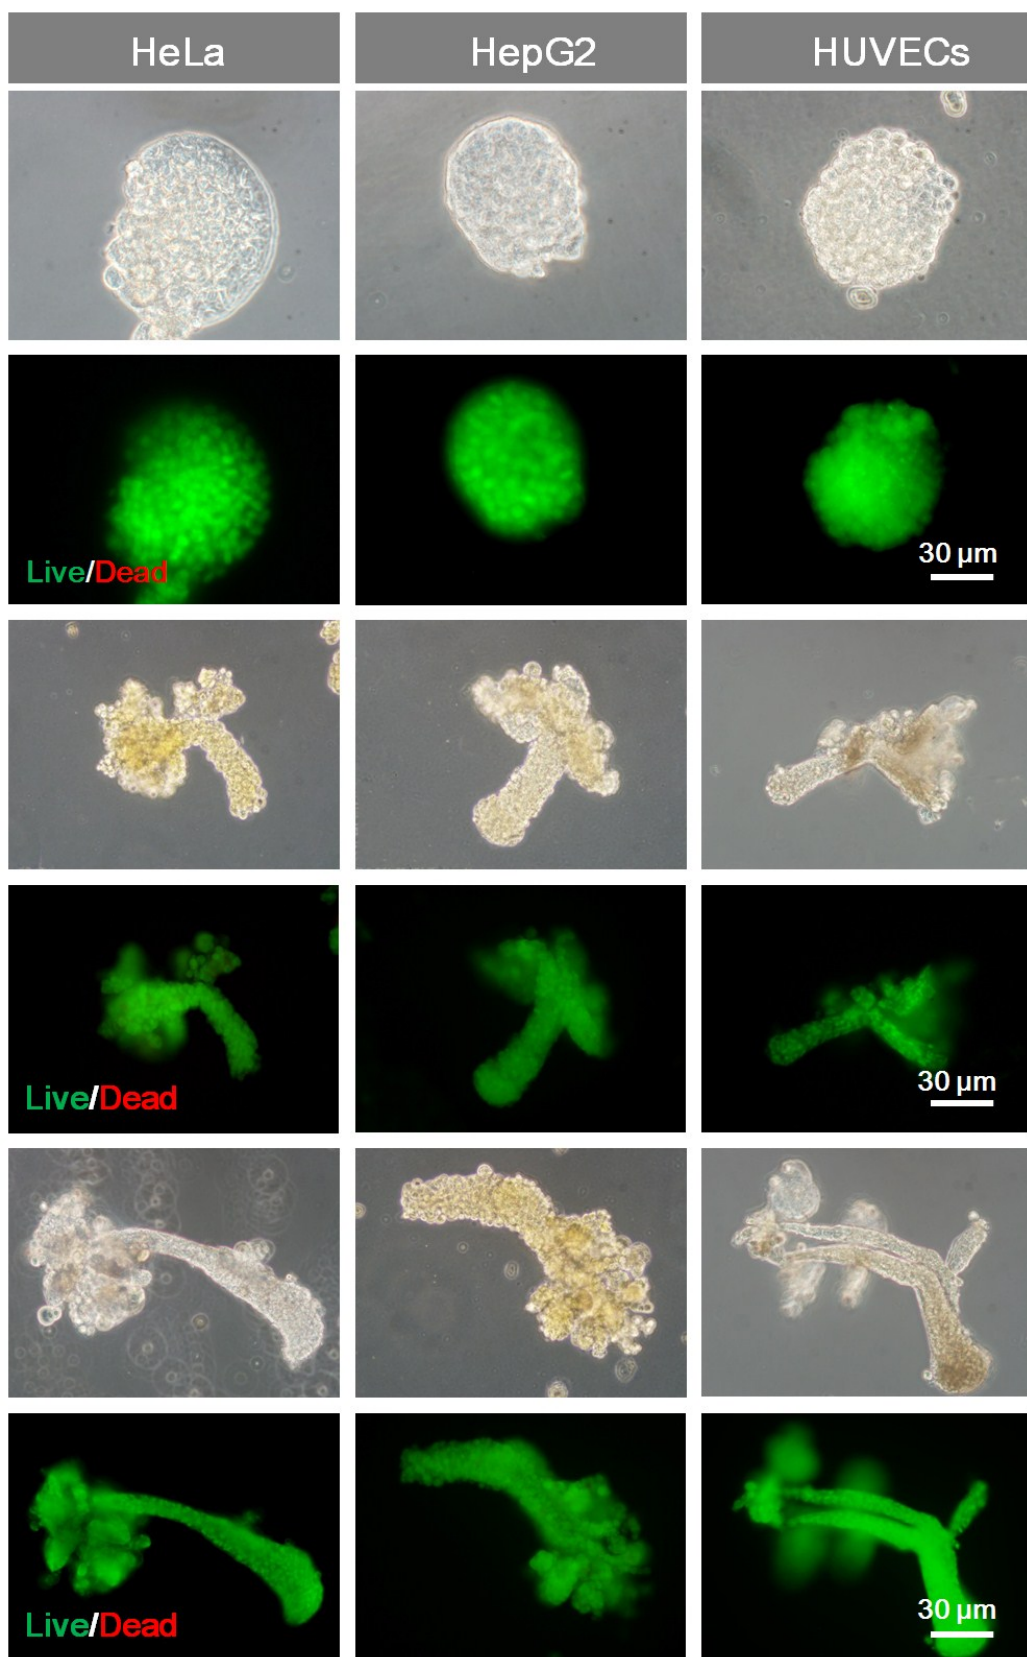

**Fig. S15.** Typical phase contrast and fluorescence image of HeLa, HepG2 and HUVEC cell aggregates with different shapes after releasing from the Ca-alginate microparticles.

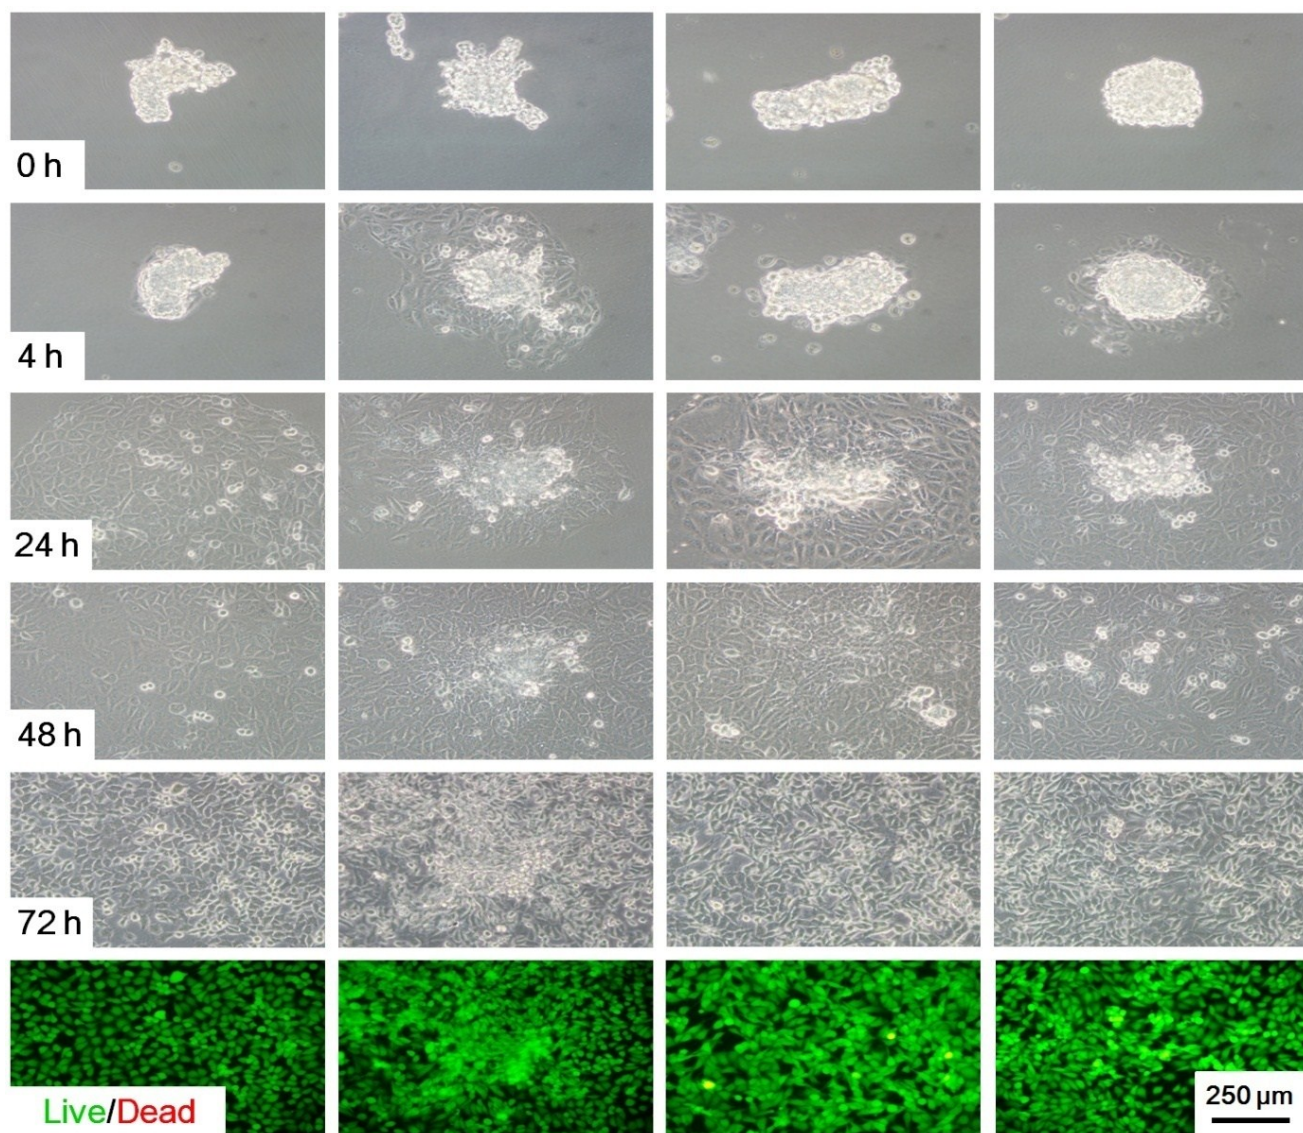

**Fig. S16.** Time-sequence images of the proliferation and viability of the retrieved HeLa cells cultured in standard culture plates.



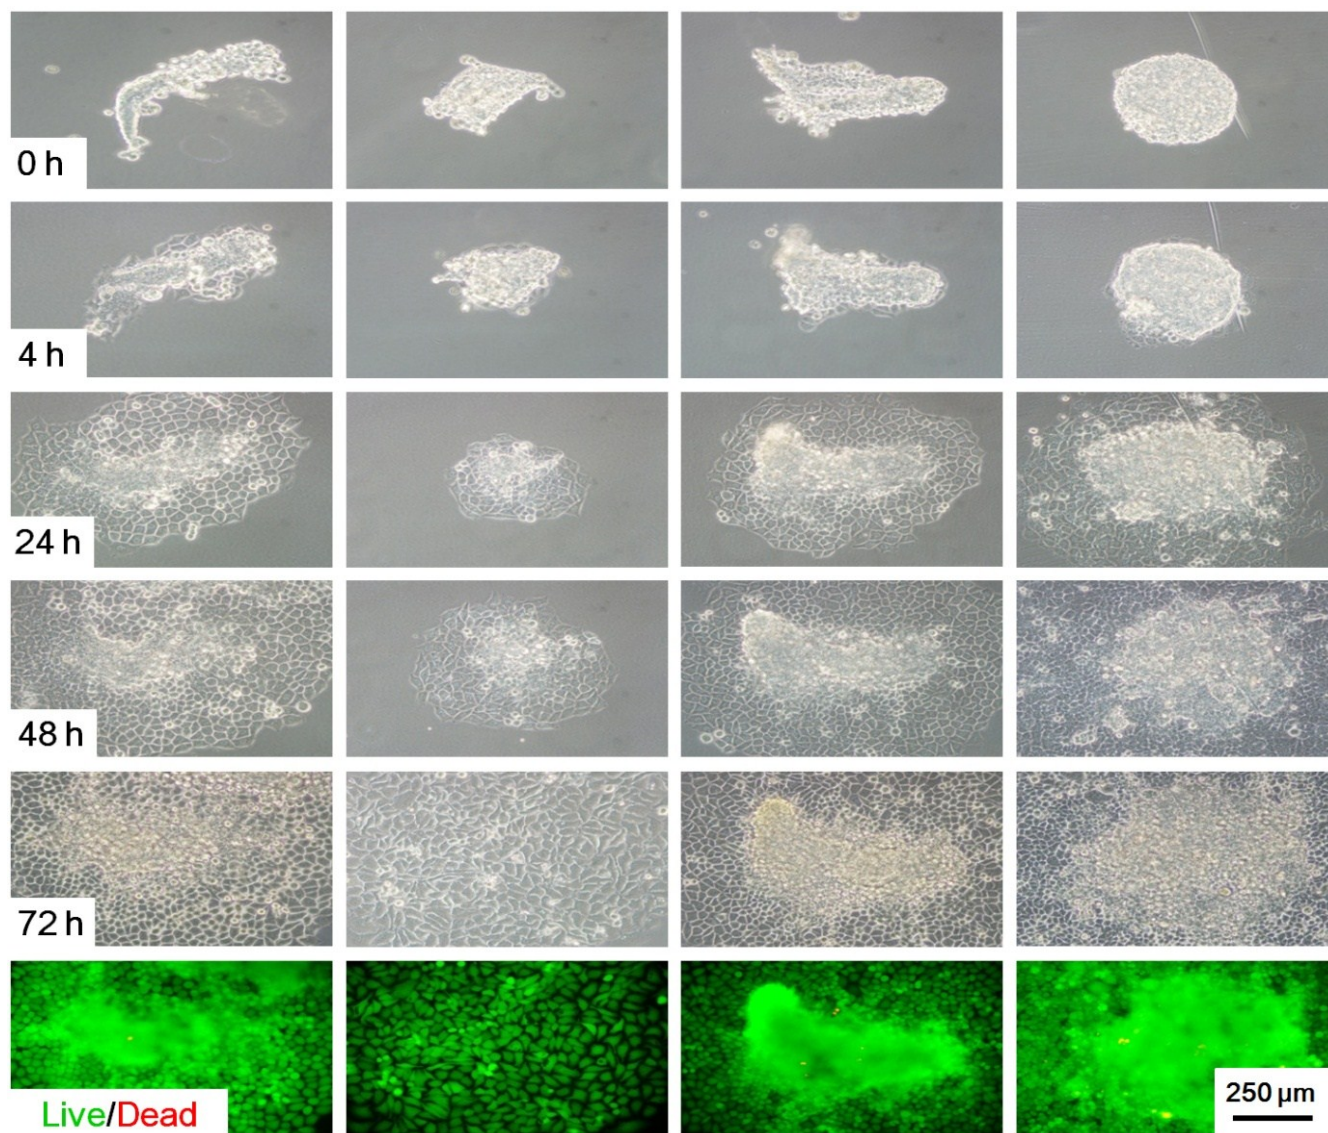

**Fig. S17.** Time-sequence images of the proliferation and viability of the retrieved HepG2 cells cultured in standard culture plates.



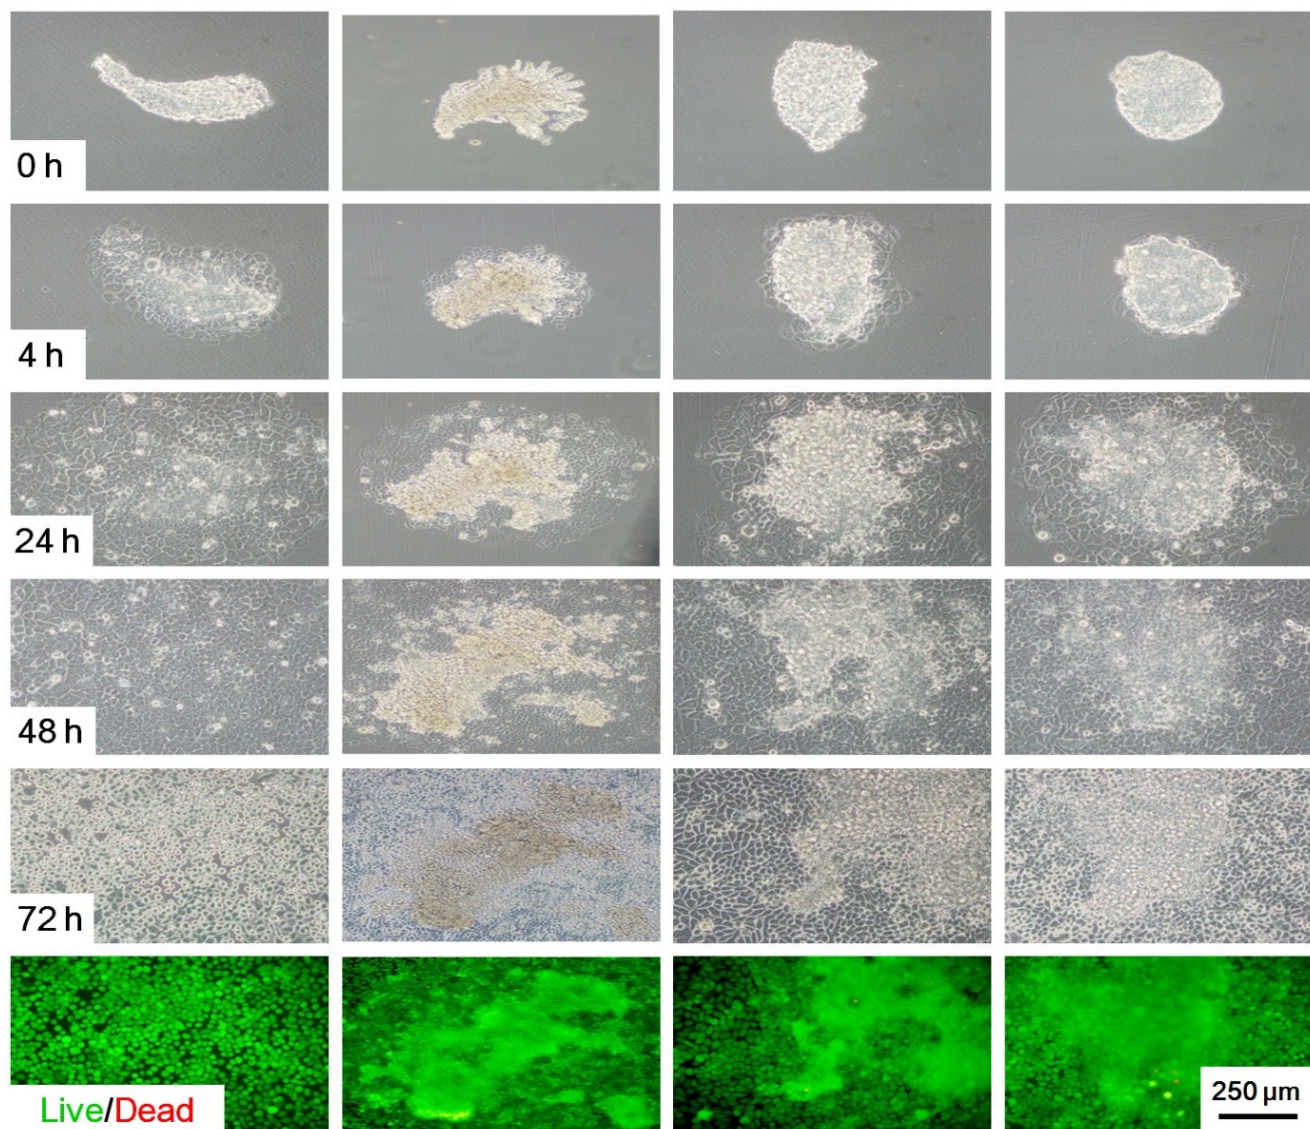

**Fig. S18.** Time-sequence images of the proliferation and viability of the retrieved HUVECs cultured in standard culture plates.
